# Supplementary material for: Age, Growth, and Functional Gonochorism with a Twist of Diandric Protogyny in Goliath Grouper from the Atlantic Coast of Florida
Source: MDPI journal article supplement (doi:10.3390/fishes8080412), 2023-08-11
Supplement: s1 [file s1]

Table S1. Monthly numbers (*n*) and total lengths (mean and range) of Goliath Grouper sampled off the east coast of Florida during 2010-2016.

| Month     | Females |      |           | Hermaphrodites |      |           | Males |      |           | Unknown Sex |      |           |
|-----------|---------|------|-----------|----------------|------|-----------|-------|------|-----------|-------------|------|-----------|
|           | n       | Mean | Range     | n              | Mean | Range     | n     | Mean | Range     | n           | Mean | Range     |
| January   |         |      |           |                |      |           |       |      |           | 1           | 147  |           |
| February  |         |      |           |                |      |           |       |      |           | 1           | 161  |           |
| March     |         |      |           |                |      |           |       |      |           | 7           | 166  | (147-180) |
| April     |         |      |           |                |      |           |       |      |           | 2           | 122  | (109-134) |
| May       | 22      | 164  | (133-195) | 7              | 171  | (133-209) | 12    | 160  | (134-188) | 16          | 154  | (105-188) |
| June      | 9       | 160  | (129-204) |                |      |           | 15    | 161  | (129-218) | 23          | 162  | (106-197) |
| July      | 13      | 169  | (136-190) | 2              | 176  | (162-190) | 20    | 179  | (155-216) | 10          | 156  | (129-188) |
| August    | 73      | 177  | (123-218) | 9              | 153  | (108-197) | 98    | 167  | (104-225) | 20          | 140  | (104-211) |
| September | 111     | 176  | (127-228) | 13             | 171  | (129-208) | 95    | 165  | (124-204) | 17          | 133  | ( 82-188) |
| October   | 22      | 163  | (128-198) | 1              | 179  |           | 23    | 163  | (114-192) | 2           | 164  | (126-203) |
| November  | 1       | 203  |           |                |      |           |       |      |           |             |      |           |
| December  | 6       | 140  | (122-164) |                |      |           | 1     | 139  |           | 1           | 153  |           |
| Total     | 257     | 172  | (122-228) | 32             | 166  | (108-209) | 264   | 166  | (104-225) | 100         | 150  | (82-211)  |
